# Supplementary material
Source: PubMed Central journal article supplement (PMC10330342)

**Supplemental Figures:**

**sFig. 1. Treatment schema & Sampling Timepoints**

N-acetylcysteine (N) was infused over 30-60 minutes (see Patients & Methods) beginning four hours after completion of routine cisplatin chemotherapy (C, infused in 1-6 hours per treatment regimen). Serial serum concentrations for NAC and glutathione were collected before and after cisplatin and NAC (arrows).

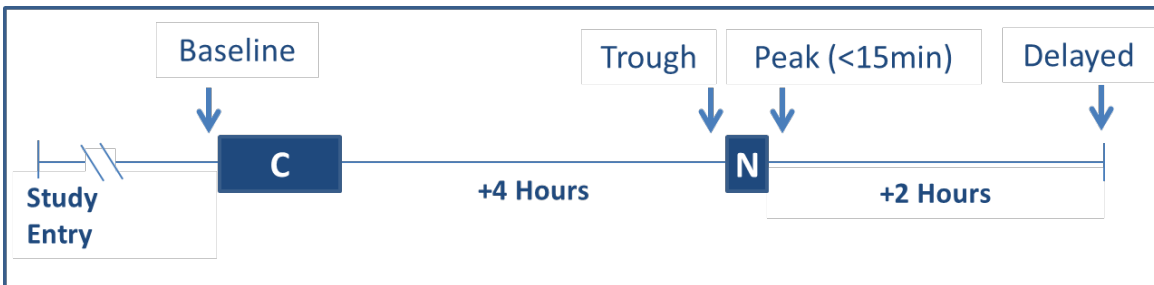

Supplement: NIHMS1899571-supplement-1.pdf [file NIHMS1899571-supplement-1.pdf]
