# Supplementary material
Source: PubMed Central journal article supplement (PMC10330342)

**sFig. 2. Cumulative incidence of SIOP Grade  $\geq 2$  hearing loss**

Time from start of cisplatin therapy to first incidence of SIOP Grade  $\geq 2$  hearing loss in evaluable patients completing NAC rescue after each dose of cisplatin (Cox multivariable model,  $p=0.034$ ). Two patients in each arm underwent autologous stem cell transplant with post-transplant hearing evaluations (two additional patients were censored prior to transplant without post-transplant hearing evaluations).

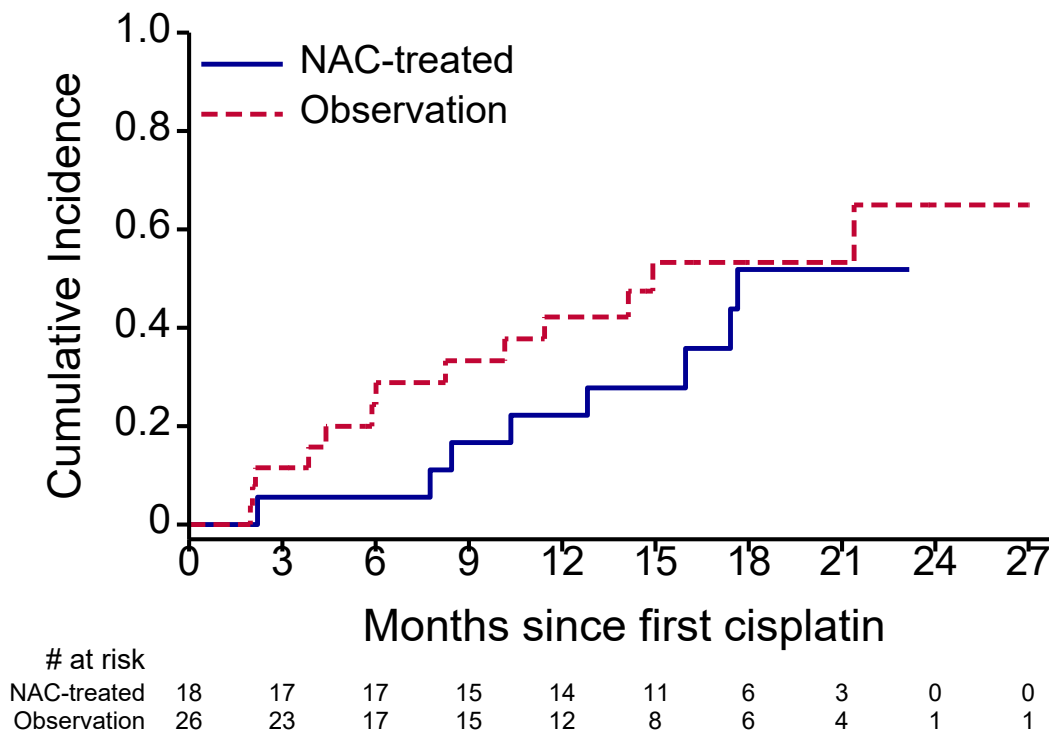

Supplement: NIHMS1899571-supplement-2.pdf [file NIHMS1899571-supplement-2.pdf]
