# Supplementary material
Source: PubMed Central journal article supplement (PMC10330342)

**sFig 3: Change in serum glutathione concentrations following NAC infusion**

Concentration of glutathione (GSH, mM) measured in the serum in the observation (OBS) arm and by dose level (DL). Median peak GSH concentration was significantly different among all four groups (Observation and all DL,  $p < 0.001$ ). Peak concentrations were significantly different from the pre-NAC trough at DL2 (300 mg/kg) and DL3 (450mg/kg). At the delayed +2 hours timepoint, only GSH in DL3 remained borderline different from baseline and from the observation group. \* $p < 0.1$  \*\* $p = 0.002$

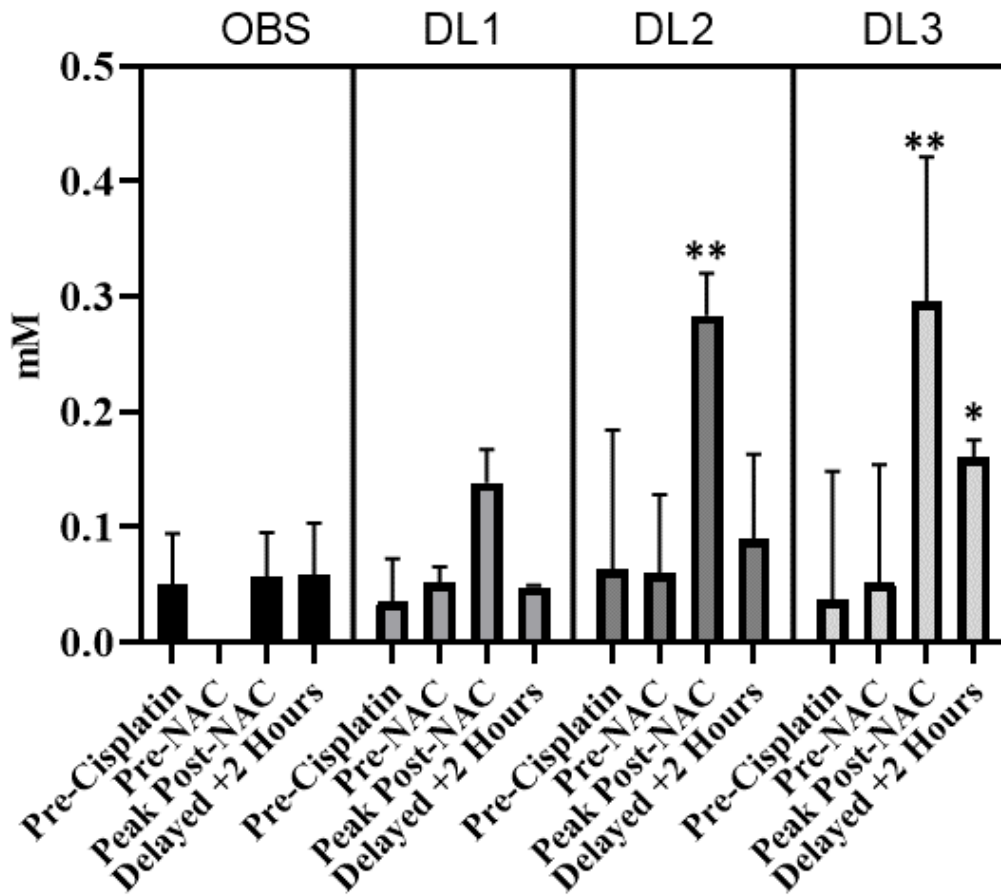

Supplement: NIHMS1899571-supplement-3.pdf [file NIHMS1899571-supplement-3.pdf]
