# Supplementary material
Source: PubMed Central journal article supplement (PMC10330342)

**sFig 5: Progression-free survival in NAC treated and observation patients**

Progression-free survival (PFS) using Kaplan-Meier analyses comparing between (A) treatment arms and (B) treatment arms further classified as localized disease (NAC treated, Observation) and metastatic (disseminated) disease at presentation (“Obs disseminated”) (B).

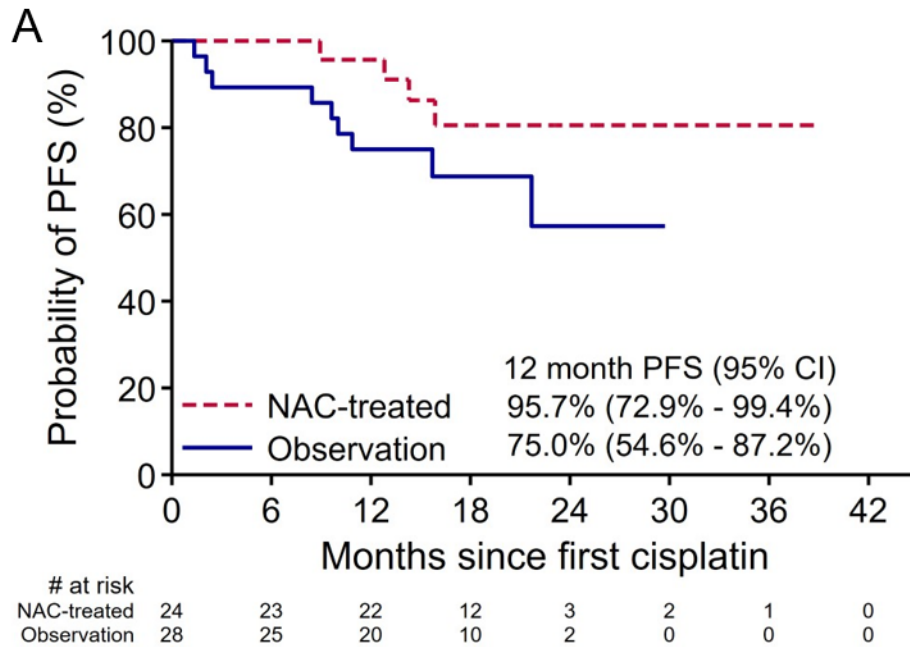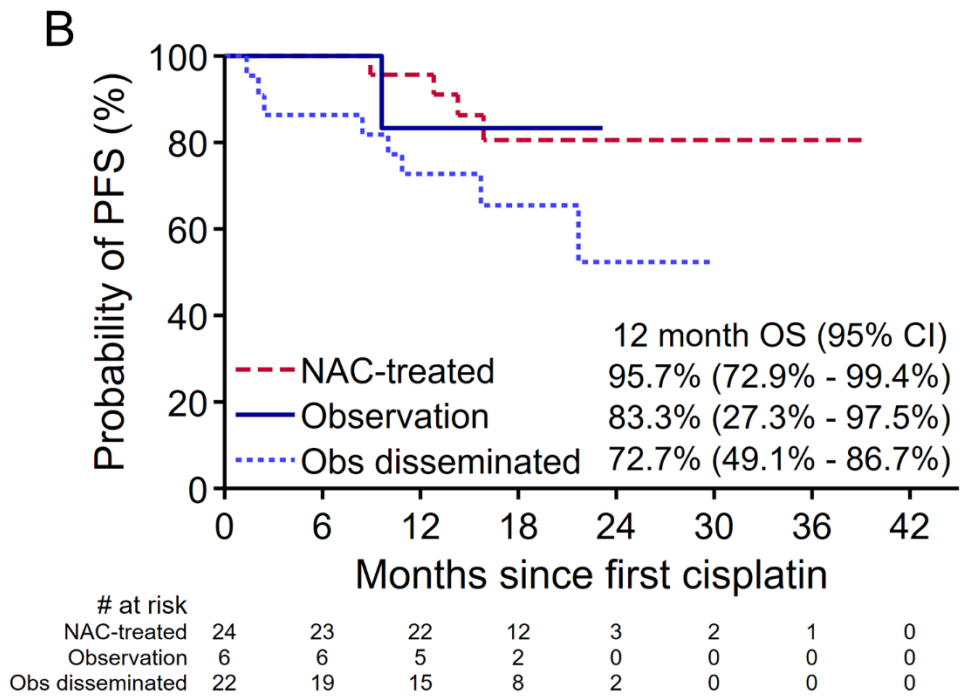

Supplement: NIHMS1899571-supplement-5.pdf [file NIHMS1899571-supplement-5.pdf]
