# Supplementary material
Source: PubMed Central journal article supplement (PMC10330342)
Supplement: NIHMS1899571-supplement-6.pdf [file NIHMS1899571-supplement-6.pdf]

## Table of Contents

|                                                                                                                   |    |
|-------------------------------------------------------------------------------------------------------------------|----|
| Supplemental Tables:.....                                                                                         | 2  |
| sTable 1: Representativeness of Study Participants .....                                                          | 2  |
| sTable 2: Comparison of dose-escalation and dose-expansion cohorts .....                                          | 3  |
| sTable 3: Dose-based univariable and multivariable Cox model analyses for time to SIOP $\geq 2$ hearing loss..... | 4  |
| sTable 4: Diagnosis-based univariable and multivariable Cox model for time to SIOP $\geq 2$ hearing loss .....    | 4  |
| sTable 5: Multivariate models of candidate gene analyses for trial endpoints .....                                | 5  |
| sTable 6: Multivariable linear and logistic models for renal and marrow toxicity .....                            | 6  |
| Supplemental Figures: .....                                                                                       | 7  |
| sFig. 1. Treatment schema & Sampling Timepoints.....                                                              | 7  |
| sFig. 2. Cumulative incidence of SIOP Grade $\geq 2$ hearing loss .....                                           | 7  |
| sFig 3: Change in serum glutathione concentrations following NAC infusion .....                                   | 8  |
| sFig 4: Evaluation of long-term storage of serum specimens (NAC assay) .....                                      | 9  |
| sFig 5: Progression-free survival in NAC treated and observation patients .....                                   | 10 |

**Supplemental Tables:**

**sTable 1: Representativeness of Study Participants**

|                                                                                                                                                     |                                                                                                                                                                                                                                                                                                                                                                                                                                                                                                                                                                                                                                                      |
|-----------------------------------------------------------------------------------------------------------------------------------------------------|------------------------------------------------------------------------------------------------------------------------------------------------------------------------------------------------------------------------------------------------------------------------------------------------------------------------------------------------------------------------------------------------------------------------------------------------------------------------------------------------------------------------------------------------------------------------------------------------------------------------------------------------------|
| <i>Cancer types</i>                                                                                                                                 | Cisplatin is used to treat tumors in both children and adults. In children, this includes osteosarcoma, hepatoblastoma and hepatocellular carcinomas, medulloblastoma, atypical teratoid/rhabdoid tumors (AT/RT), neuroblastoma, germ cell tumors, and other sarcomas. In adults, common cisplatin-treated tumors include germ cell tumors as well as non–small-cell lung, bladder, and head and neck cancers. It is estimated that over 500,000 patients annually in the United States are diagnosed with cisplatin-treated tumors.                                                                                                                 |
| <i>Demographic Considerations</i>                                                                                                                   |                                                                                                                                                                                                                                                                                                                                                                                                                                                                                                                                                                                                                                                      |
| Age                                                                                                                                                 | Cisplatin is used to treat tumors across all ages, including infants, children, adolescents, young adults, and older adults. After accounting for cisplatin dosing and multimodal treatment, younger children less than five years of age at cisplatin exposure appear to be at greatest risk for developing hearing loss.                                                                                                                                                                                                                                                                                                                           |
| Sex                                                                                                                                                 | Cisplatin is used to treat tumors that occur in both sexes. There is a slight male predominance reported in data from cisplatin-treated trials (In the Children’s Oncology Group ACCL0431 trial <sup>1</sup> [60% male] and SIOPEI-6 trial <sup>2</sup> [54% male]) and in cohort studies, such as the landmark study from Moke et al <sup>3</sup> (56% male).                                                                                                                                                                                                                                                                                       |
| Race/Ethnicity                                                                                                                                      | Patients of all races and ethnicities develop tumors treated with cisplatin. There are no known differences among races and ethnicities in risk of developing cisplatin-induced hearing loss.                                                                                                                                                                                                                                                                                                                                                                                                                                                        |
| <i>Geographic Considerations</i>                                                                                                                    | Cisplatin-based regimens vary considerably based on geography, with differences in cisplatin dosing and infusion schedules, including within the United States and internationally. However, hearing loss due to cisplatin is related to dosing and administration schedules independent of geography. Multiple grading systems for cisplatin-induced hearing loss endpoints are in use internationally; in children, a consensus system from the International Society of Pediatric Oncology (SIOP Ototoxicity Scale) offers a uniform international grading scale.                                                                                 |
| <i>Incidence of Hearing Loss</i>                                                                                                                    | Hearing loss from cisplatin occurs in ~40% of children across all tumor types, with increased prevalence in some tumor subtypes (brain tumors, hepatoblastoma, neuroblastoma) and in younger children (less than five years old at exposure).                                                                                                                                                                                                                                                                                                                                                                                                        |
| <i>Other Considerations</i>                                                                                                                         | Data from the COG ACCL0431 trial raised concern for a potential adverse impact on survival from use of thiol agents in patients with metastatic tumors at presentation. As such, use of systemic thiol agents is not recommended in this population.                                                                                                                                                                                                                                                                                                                                                                                                 |
| <b>Overall Representativeness</b>                                                                                                                   | <b>The population in this trial is therefore broadly representative of the pediatric oncology population being treated with cisplatin-based regimens, including for ages (i.e., children and adolescents) and tumor types enrolled. Patients receiving NAC in the intervention arm of this trial are similarly broadly representative of patients recommended to receive thiol-based systemic otoprotection. Use of an international consensus ototoxicity grading system, and incorporation of detailed cisplatin dosing into all analyses, further augmented the representativeness of the data internationally and across cisplatin regimens.</b> |
| <sup>1</sup> Freyer et al Lancet Oncol, 2017; <sup>2</sup> Brock et al N Engl J Med, 2018; <sup>3</sup> Moke et al Lancet Child Adolesc Health 2021 |                                                                                                                                                                                                                                                                                                                                                                                                                                                                                                                                                                                                                                                      |

**sTable 2: Comparison of dose-escalation and dose-expansion cohorts**

| Variable                                       | Dose-Escalation<br>n (%) | Dose-Expansion<br>n (%) | p-value |
|------------------------------------------------|--------------------------|-------------------------|---------|
| Total                                          | 15                       | 9                       |         |
| Age at first Cisplatin dose                    |                          |                         |         |
| 0-5                                            | 6 (40)                   | 3 (33)                  | 0.504   |
| 6-10                                           | 3 (20)                   | 4 (44)                  |         |
| ≥11                                            | 6 (40)                   | 2 (22)                  |         |
| Sex                                            |                          |                         |         |
| Male                                           | 8 (53)                   | 6 (67)                  | 0.678   |
| Female                                         | 7 (47)                   | 3 (33)                  |         |
| Race                                           |                          |                         |         |
| White                                          | 12 (80)                  | 8 (89)                  | 0.442   |
| Black or African American                      | 1 (7)                    | 0 (0)                   |         |
| Asian & Pacific Islander                       | 2 (13)                   | 0 (0)                   |         |
| Other/Not Reported                             | 0 (0)                    | 1 (11)                  |         |
| Ethnicity                                      |                          |                         |         |
| Hispanic/Latinx                                | 8 (53)                   | 5 (56)                  | 1.000   |
| Not Hispanic/Latinx                            | 7 (47)                   | 4 (44)                  |         |
| Tumor type                                     |                          |                         |         |
| Hepatic tumor                                  | 5 (33)                   | 0 (0)                   | 0.190   |
| CNS tumor                                      | 5 (33)                   | 4 (44)                  |         |
| Osteosarcoma                                   | 5 (33)                   | 5 (56)                  |         |
| Starting cisplatin dose/day, mg/m <sup>2</sup> |                          |                         |         |
| Median (range)                                 | 108.60 (75.2, 142.0)     | 104.30 (90.8, 131.4)    | 0.655   |
| Cumulative Cisplatin dose, mg/m <sup>2</sup>   |                          |                         |         |
| Median (range)                                 | 457.70 (202.2, 619.7)    | 469.00 (210.4, 952.8)   | 0.929   |
| Reduction in cisplatin dose                    |                          |                         |         |
| No                                             | 11 (73)                  | 8 (89)                  | 0.615   |
| Yes                                            | 4 (27)                   | 1 (11)                  |         |
| Pretreatment Cranial radiation                 |                          |                         |         |
| No                                             | 11 (73)                  | 8 (89)                  | 0.614   |
| Yes                                            | 4 (27)                   | 1 (11)                  |         |
| Autologous stem cell transplant                |                          |                         |         |
| No                                             | 14                       | 8                       | 1.000   |
| Yes                                            | 1                        | 1                       |         |
| VPS prior to cisplatin                         |                          |                         |         |
| No                                             | 12 (80)                  | 6 (67)                  | 0.635   |
| Yes                                            | 3 (20)                   | 3 (33)                  |         |

CNS = central nervous system; VPS = ventriculoperitoneal shunt.

**sTable 3: Dose-based univariable and multivariable Cox model analyses for time to SIOP  $\geq 2$  hearing loss**

| Covariable        | # event/total | Univariable analysis  |         | Multivariable analysis |         |
|-------------------|---------------|-----------------------|---------|------------------------|---------|
|                   | n/n           | HR (95% CI)           | p-value | HR (95% CI)            | p-value |
| Age, years        |               |                       |         |                        |         |
| 0-5               | 14/19         | 7.020 (1.928, 45.029) | 0.037   | 3.494 (0.573, 29.263)  | 0.102   |
| 6-10              | 6/11          | 4.871 (1.114, 33.390) |         | 6.083 (1.294, 43.277)  |         |
| $\geq 11$         | 2/14          | Reference group       |         | Reference group        |         |
| Cisplatin Dosing  |               | 1.025 (1.006, 1.048)  | 0.018   | 1.021 (0.994, 1.057)   | 0.162   |
| NAC Otoprotection |               |                       |         |                        |         |
| Yes               | 8/18          | 0.645 (0.255, 1.535)  | 0.331   | 0.342 (0.123, 0.897)   | 0.032   |
| No                | 14/26         | Reference group       |         | Reference group        |         |

NAC = N-acetylcysteine; HR = Hazard Ratio; 95% CI = 95% Confidence Interval

**sTable 4: Diagnosis-based univariable and multivariable Cox model for time to SIOP  $\geq 2$  hearing loss**

| Covariable        | # event/total | Univariable Analysis  |         | Multivariable Analysis |         |
|-------------------|---------------|-----------------------|---------|------------------------|---------|
|                   | n/n           | HR (95%CI)            | p-value | HR (95%CI)             | p-value |
| Age, years        |               |                       |         |                        |         |
| 0-5               | 14/19         | 7.020 (1.928, 45.029) | 0.037   | 5.269 (1.052, 41.647)  | 0.075   |
| 6-10              | 6/11          | 4.871 (1.114, 33.390) |         | 6.675 (1.425, 47.326)  |         |
| $\geq 11$         | 2/14          | Reference group       |         | Reference group        |         |
| Tumor type        |               |                       |         |                        |         |
| CNS               | 9/16          | 0.622 (0.228, 1.698)  | 0.155   | 0.653 (0.199, 1.988)   | 0.617   |
| OST               | 3/10          | 0.261 (0.057, 0.908)  |         | 0.505 (0.073, 3.121)   |         |
| Other             | 2/9           | 0.286 (0.043, 1.146)  |         | 0.282 (0.033, 1.571)   |         |
| Hepatic           | 8/9           | Reference group       |         | Reference group        |         |
| NAC Otoprotection |               |                       |         |                        |         |
| Yes               | 8/18          | 0.645 (0.255, 1.535)  | 0.331   | 0.348 (0.127, 0.915)   | 0.034   |
| No                | 14/26         | Reference group       |         | Reference group        |         |

NAC = N-acetylcysteine; HR = Hazard Ratio; 95% CI = 95% Confidence Interval; CNS = central nervous system tumor, OST = osteosarcoma.

**sTable 5: Multivariate models of candidate gene analyses for trial endpoints**

| Gene         | SNP                    | Chr:Position                | Effect Allele | MODEL #1*               |         | MODEL #2*                |         | MODEL #3*                      |         | MODEL #4*                   |         |
|--------------|------------------------|-----------------------------|---------------|-------------------------|---------|--------------------------|---------|--------------------------------|---------|-----------------------------|---------|
|              |                        |                             |               | OR (95%CI)              | p-value | OR (95%CI)               | p-value | $\beta$ Coefficient (95%CI)    | p-value | $\beta$ Coefficient (95%CI) | p-value |
| <b>GSTP1</b> | rs1695                 | 11:67352689                 | G             | 1.634<br>(0.5641-4.732) | 0.366   | 17.62<br>(1.525-203.6)   | 0.022   | 0.0218<br>(-0.0121-0.0557)     | 0.217   | 0.0067<br>(-0.0498-0.0633)  | 0.817   |
| <b>GSTM3</b> | rs36120609             | 1:110280253-<br>1:110280257 | -             | 1.227<br>(0.3786-3.974) | 0.733   | 0.8866<br>(0.2075-3.789) | 0.871   | -0.0127<br>(-0.0506-0.0252)    | 0.516   | 0.0082<br>(-0.0532-0.0695)  | 0.796   |
| <b>GSTP1</b> | rs1138272              | 11:67353579                 | T             | 3.029<br>(0.1408-65.13) | 0.479   | 4.995<br>(0.1525-163.6)  | 0.366   | -0.0847<br>(-0.2200-0.0505)    | 0.229   | -0.0800<br>(-0.2952-0.1352) | 0.472   |
| <b>GSTA1</b> | rs3957357              | 6:52668687                  | A             | 1.362<br>(0.491-3.778)  | 0.553   | 0.8362<br>(0.236-2.963)  | 0.782   | -0.0056<br>(-0.0437-0.0326)    | 0.777   | -0.0045<br>(-0.0644-0.0553) | 0.883   |
| <b>GPX5</b>  | rs451774               | 6:28502550                  | G             | 2.6<br>(0.9317-7.258)   | 0.068   | 2.979<br>(0.7417-11.97)  | 0.124   | -0.0035<br>(-0.0357-0.0286)    | 0.834   | -0.0446<br>(-0.0969-0.0078) | 0.107   |
| <b>GSTT1</b> | Null versus 1-2 copies |                             |               | 1.365<br>(0.192-9.692)  | 0.756   | 1.340<br>(0.112-16.086)  | 0.818   | -0.0603<br>(-0.1889-0.0682)    | 0.373   | -0.0035<br>(-0.1928-0.1231) | 0.669   |
| <b>GSTM1</b> | Null versus 1-2 copies |                             |               | 0.649<br>(0.130-3.238)  | 0.598   | 0.518<br>(0.070-3.807)   | 0.518   | -0.1168<br>(-0.1980-(-0.0355)) | 0.014   | -0.0071<br>(-0.1142-0.0100) | 0.897   |

\* Model #1: Logistic regression, endpoint SIOP Grade  $\geq 2$  vs Grade  $< 2$  **at end of therapy**  
 Model #2: Logistic regression, endpoint SIOP Grade  $\geq 2$  vs Grade  $< 2$  **at latest follow-up**  
 Model #3: Linear regression, endpoint GSH at **+4 hours from completion of cisplatin (NAC peak)**  
 Model #4: Linear regression, endpoint GSH at **+6 hours from completion of cisplatin (delayed level)**  
 All models included covariates: age at diagnosis (in years), cisplatin dose, completed all planned NAC.  
 NAC = N-acetylcysteine, OR = Odds ratio, 95%CI= 95% Confidence Interval.

**sTable 6: Multivariable linear and logistic models for renal and marrow toxicity**

| Covariable        | Maximum Serum Creatinine<br>log(Maximum creatinine, mg/dl) |         | Renal Tubular Damage<br>(Electrolyte supplementation*) |         | Cycle Duration<br>log(Median duration of phase) |         |
|-------------------|------------------------------------------------------------|---------|--------------------------------------------------------|---------|-------------------------------------------------|---------|
|                   | Mean diff. (95% CI)                                        | p-value | OR (95% CI)                                            | p-value | Mean diff. (95% CI)                             | p-value |
| Age, years        |                                                            |         |                                                        |         |                                                 |         |
| 0-5 vs. ≥11       | -0.610 (-0.888, 0.331)                                     | <0.001  | 0.182 (0.021, 1.580)                                   | 0.044   | -0.050 (-0.207, 0.107)                          | 0.224   |
| 6-10 vs. ≥11      | -0.120 (-0.397, 0.157)                                     |         | 3.021 (0.500, 18.256)                                  |         | 0.091 (-0.065, 0.247)                           |         |
| Tumor type*       |                                                            |         |                                                        |         |                                                 |         |
| CNS vs. Hepatic   | 0.156 (-0.139, 0.452)                                      | 0.039   | 0.211 (0.029, 1.552)                                   | 0.210   | 0.249 (0.082, 0.415)                            | 0.001   |
| OST vs. Hepatic   | 0.397 (0.030, 0.764)                                       |         | 0.137 (0.011, 1.769)                                   |         | 0.461 (0.255, 0.668)                            |         |
| Other vs. Hepatic | 0.499 (0.126, 0.871)                                       |         | 0.038 (0.002, 0.845)                                   |         | 0.188 (-0.022, 0.398)                           |         |
| NAC Otoprotection |                                                            |         |                                                        |         |                                                 |         |
| Yes vs. No        | -0.003 (-0.220, 0.215)                                     | 0.981   | 0.451 (0.113, 1.811)                                   | 0.262   | -0.130 (-0.252, -0.008)                         | 0.038   |

\*Includes prescription for Magnesium, Calcium, Phosphorus, and/or Potassium supplementation. NAC = N-acetylcysteine, OR = Odds ratio, 95%CI= 95% Confidence Interval. CNS = central nervous system tumor, OST = osteosarcoma.
